# Supplementary material
Source: Springer Nature journal article supplement (https://www.springermedizin.de/resource/supplementary/13231_2011_42_MOESM1_ESM.pdf/9676394)

**A**50% confluencyDFOO<sub>2</sub> (%)

21%

21%

1%

HIF 2 $\alpha$ 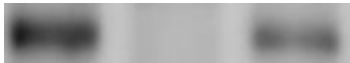HIF 1 $\alpha$ 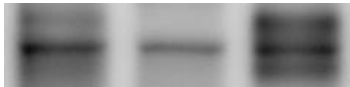

actin

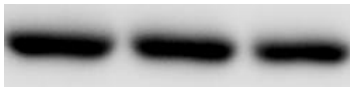**B**90% confluencyDFO

21%

21%

1%

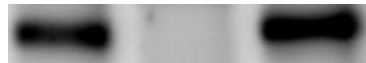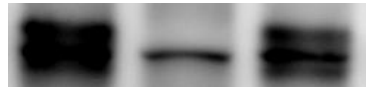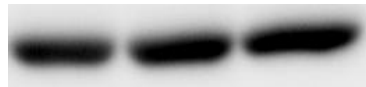

Supplement: MOESM1 [file 9676394]
